# Supplementary material for: Ileal mucosa-associated microbiota overgrowth associated with pathogenesis of primary biliary cholangitis
Source: PubMed Central journal article supplement (PMC8492680; doi:10.1038/s41598-021-99314-9), 2021-10-05
Supplement: 41598_2021_99314_MOESM2_ESM.pdf [file 41598_2021_99314_MOESM2_ESM.pdf]

**a**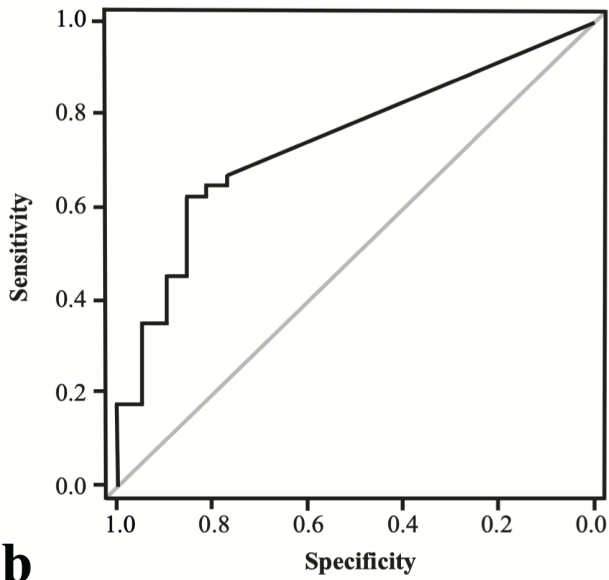**b**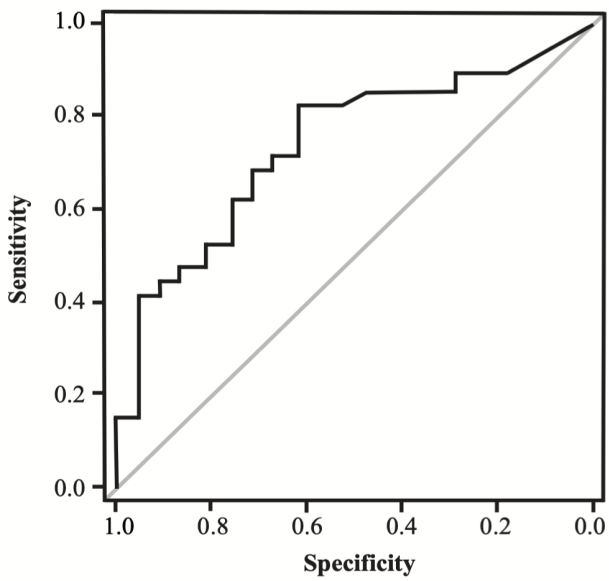

Supplementary figure 2: Characteristics of gut microbiota that distinguishes patients with primary biliary cholangitis (PBC) from healthy individuals

Receiving operational curve analysis was performed for (a) *Sphingomonadaceae* data

(PBC: 34; control: 21, AUC = 0.745) and (b) *Pseudomonas* data (PBC: 34; control: 21, AUC = 0.735), respectively.

The diagonals indicate a random classification (AUC = 0.5).
