# Supplementary material for: Ileal mucosa-associated microbiota overgrowth associated with pathogenesis of primary biliary cholangitis
Source: PubMed Central journal article supplement (PMC8492680; doi:10.1038/s41598-021-99314-9), 2021-10-05
Supplement: 41598_2021_99314_MOESM3_ESM.pdf [file 41598_2021_99314_MOESM3_ESM.pdf]

**Patients with primary biliary cholangitis (PBC)  
and healthy controls (HCs) recruited to the study**  
[n= 41 PBC, n=24 HCs]

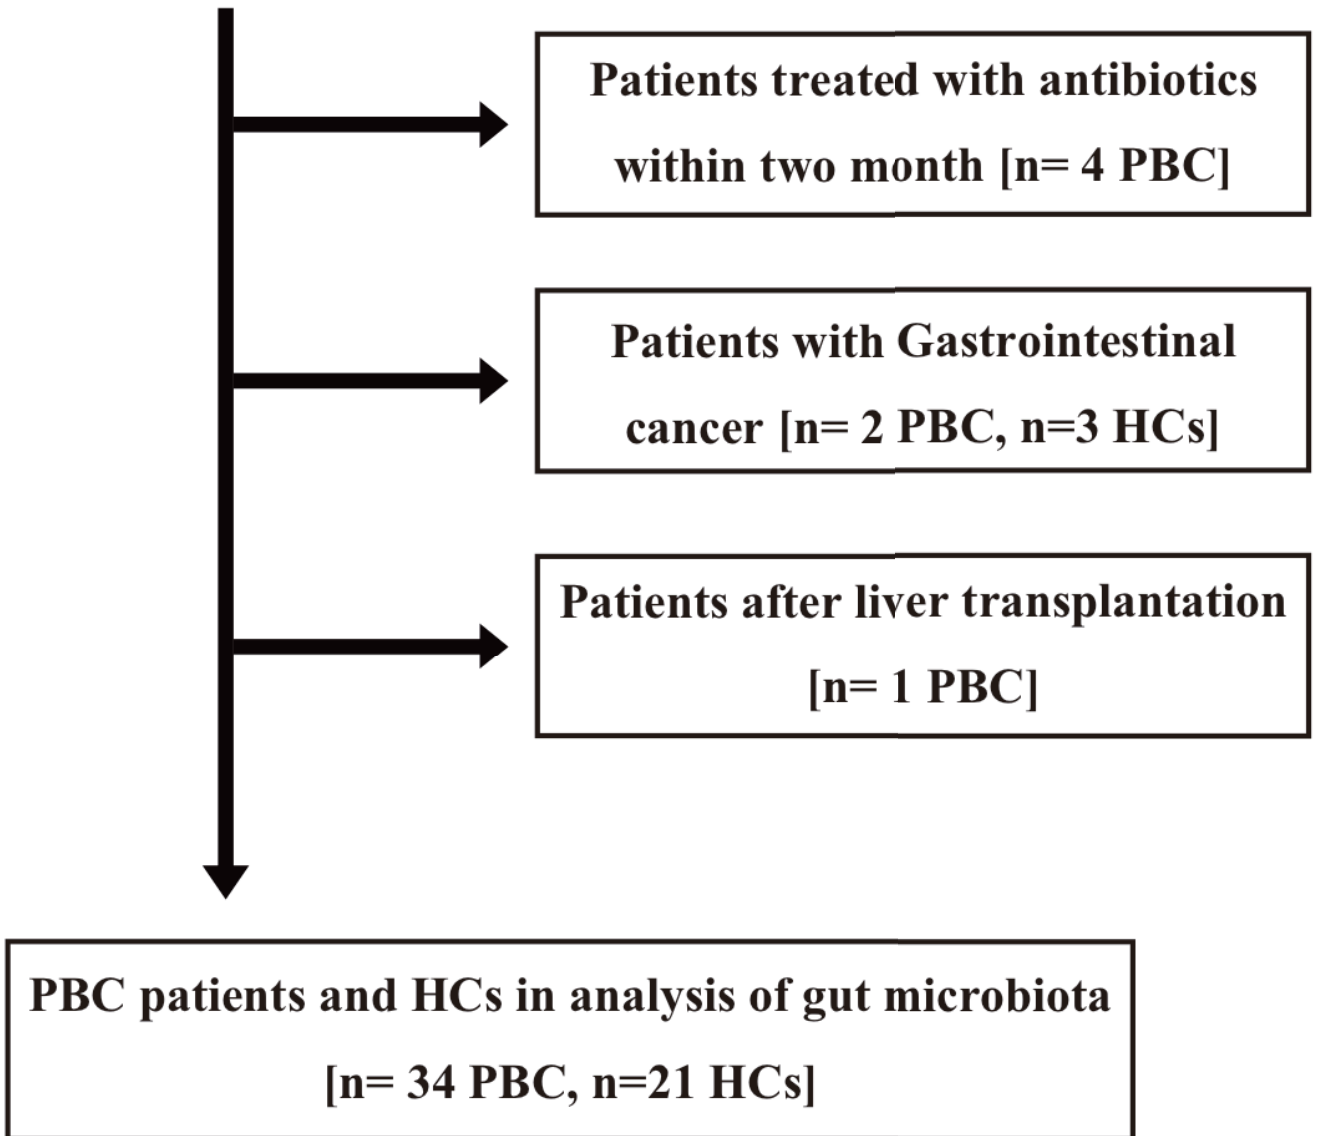

Supplementary figure 3: Patient flow chart of the study
